# Supplementary material
Source: Research Square preprint supplement (doi:10.21203/rs.3.rs-9837916/v1)
Supplement: Supplementary file 1 [file 5d2b0893efc11cfe0e72cefe.doc]

**Highlights**

- Cloud-improved coupling model assessed system spatiotemporal adaptability.
- Composite system coordination improved over time while spatial asymmetry persists.
- Composite system bottlenecks shifted from ecological factors to strict water limits.
- Water network projects promoted spatial synergy but triggered tight supply.
- Proposed sustainable development paths for competitive functional areas.
